# Supplementary material for: The naked truth about HIV and risk taking in Swedish prisons: A qualitative study
Source: PubMed Central journal article supplement (PMC5536296; doi:10.1371/journal.pone.0182237), 2017-07-31
Supplement: pone.0182237.s004.pdf [file pone.0182237.s004.pdf]

# Intervjuguide

*Temor som kommer diskuteras:*

- Kan du berätta om dina tankar kring risken att smittas av hiv i fängelse?
- Kan du berätta lite om dina erfarenheter av förekomst av droger i fängelset?
- Vad är dina erfarenheter av tatuering och piercing i fängelset?
- Vad är dina erfarenheter kring om intagna hade sexuella kontakter?
- Var kondomer tillgängliga på fängelset?
- Vad är dina upplevelser av om intagna funderade på risken att smittas av hiv?
- Upplevde du fängelsemiljön som en utsatt miljö för hiv?
- Vad tror du kan göras för att förhindra smittspridning?
- Har du något du skulle vilja lägga till?

## ***Bakgrundsinformation***

När och hur länge har du suttit i fängelse?

Vilken anstalt och säkerhetsklass befann du dig på?
